# Supplementary material for: Modulation of Postprandial Plasma Concentrations of Digestive Hormones and Gut Microbiota by Foods Containing Oat ß-Glucans in Healthy Volunteers
Source: MDPI journal article supplement (doi:10.3390/foods12040700), 2023-02-06
Supplement: s1 [file s1]

|                                      | <b>Control<br/>(n=15)</b> | <b>β-Glucan<br/>(n=17)</b> | <b>p</b>               |
|--------------------------------------|---------------------------|----------------------------|------------------------|
| Women (%)                            | 66.6                      | 64.7                       | 0.91 (X <sub>2</sub> ) |
| Age (y)                              | 26.7 ± 2.8                | 27.1 ± 4.3                 | 0.73                   |
| Body Mass Index (kg/m <sup>2</sup> ) | 20.7 ± 6.2                | 21.6 ± 2.3                 | 0.54                   |
| Glycemia (mg/dL)                     | 88.7 ± 3.8                | 95.7 ± 8.3                 | 0.008                  |
| Ureic N <sub>2</sub> (mg/dL)         | 14.5 ± 4.6                | 15.0 ± 2.9                 | 0.72                   |
| Uric acid (mg/dL)                    | 3.43 ± 1.18               | 3.70 ± 1.24                | 0.55                   |
| Bilirubina total (mg/dL)             | 0.58 ± 0.53               | 0.49 ± 0.18                | 0,55                   |
| Alkaline phosphatase (U/L)           | 157 ± 45                  | 147 ± 42                   | 0,55                   |
| GOT (U/L)                            | 19.5 ± 3.9                | 19.6 ± 3.8                 | 0,91                   |
| LDH (U/L)                            | 306 ± 74                  | 326 ± 32                   | 0,35                   |
| Calcium (mg/dL)                      | 9.66 ± 0.44               | 9.83 ± 1.03                | 0,57                   |
| Phosforus (mg/dL)                    | 4.39 ± 0.41               | 3.71 ± 0.51                | 0,001                  |
| Albumin (g/dL)                       | 4.24 ± 0.15               | 4.32 ± 0.33                | 0,05                   |
| Total Protein (g/dL)                 | 7.01 ± 0.32               | 7.32 ± 0.48                | 0,39                   |
| CS Total                             | 182 ± 28                  | 167 ± 24                   | 0,14                   |
| CS HDL                               | 63.8 ± 15.8               | 54.3 ± 12.8                | 0,09                   |
| CS LDL                               | 96.8 ± 20.6               | 92.7 ± 24.9                | 0,64                   |
| TG                                   | 106 ± 45                  | 97.9 ± 59.2                | 0,68                   |
| CS VLDL                              | 21.2 ± 8.9                | 19.6 ± 11.8                | 0,69                   |
| CS/HDL                               | 2.99 ± 0.80               | 3.14 ± 0.74                | 0,59                   |

**Table S2:** Anthropometrical and biochemical characteristics of the subjects recruited in the Medium-term study (Means ± SD)
