# Supplementary material for: Modulation of Postprandial Plasma Concentrations of Digestive Hormones and Gut Microbiota by Foods Containing Oat ß-Glucans in Healthy Volunteers
Source: MDPI journal article supplement (doi:10.3390/foods12040700), 2023-02-06
Supplement: s1 [file s1]

| Stool consistency according to Bristol Scale | Time   | Placebo   | $\beta$ -glucan | p  |
|----------------------------------------------|--------|-----------|-----------------|----|
| Hard stools<br>(Score 1+2)                   | Week 1 | 1 [0 - 3] | 0 [0 - 1]       | NS |
|                                              | Week 2 | 0 [0 - 4] | 0 [0 - 2]       |    |
|                                              | Week 3 | 0 [0 - 3] | 0 [0 - 3]       |    |
| Normal stools<br>(Score 3+4+5)               | Week 1 | 6 [4 - 8] | 7 [4 - 10]      | NS |
|                                              | Week 2 | 6 [5 - 8] | 7 [4 - 10]      |    |
|                                              | Week 3 | 7 [4 - 9] | 7 [5 - 9]       |    |
| Watery stools<br>(Score 6+7)                 | Week 1 | 0 [0 - 1] | 0 [0 - 1]       | NS |
|                                              | Week 2 | 0 [0 - 1] | 0 [0 - 1]       |    |
|                                              | Week 3 | 0 [0 - 1] | 0 [0 - 0]       |    |

**Table S3:** Weekly frequency of stools according to their consistency (based on the Bristol Scales) in the subjects from the Placebo and  $\beta$ -glucan group during the study (Median [IQR]).
