# Supplementary material for: Modulation of Postprandial Plasma Concentrations of Digestive Hormones and Gut Microbiota by Foods Containing Oat ß-Glucans in Healthy Volunteers
Source: MDPI journal article supplement (doi:10.3390/foods12040700), 2023-02-06
Supplement: s1 [file s1]

| Phylum         | Family               | Genus            | Placebo    |               |            |               | β-Glucan   |               |            |               |
|----------------|----------------------|------------------|------------|---------------|------------|---------------|------------|---------------|------------|---------------|
|                |                      |                  | Time "0"   |               | Time "1"   |               | Time "0"   |               | Time "1"   |               |
|                |                      |                  | Prevalence | Mean +/- SD   |
| Actinobacteria |                      |                  | 1,0        | 6,8 +/- 11,3  | 1,0        | 1,4 +/- 1,9   | 1,0        | 4,8 +/- 5,0   | 1,0        | 0,9 +/- 0,8   |
|                | Actinomycetaceae     |                  | 0,6        | 0,0 +/- 0,0   | 0,1        | 0,0 +/- 0,0   | 0,4        | 0,0 +/- 0,0   | 0,1        | 0,0 +/- 0,0   |
|                |                      | Actinomyces      | 0,6        | 0,0 +/- 0,0   | 0,1        | 0,0 +/- 0,0   | 0,4        | 0,0 +/- 0,0   | 0,1        | 0,0 +/- 0,0   |
|                | Bifidobacteriaceae   |                  | 0,9        | 5,7 +/- 10,6  | 0,9        | 1,2 +/- 1,9   | 0,9        | 2,6 +/- 2,8   | 0,9        | 0,6 +/- 0,8   |
|                |                      | Bifidobacterium  | 0,9        | 5,7 +/- 10,6  | 0,9        | 1,2 +/- 1,9   | 0,9        | 2,6 +/- 2,8   | 0,9        | 0,6 +/- 0,8   |
|                | Coriobacteriaceae    |                  | 1,0        | 1,1 +/- 1,0   | 1,0        | 0,2 +/- 0,2   | 1,0        | 2,2 +/- 3,5   | 1,0        | 0,3 +/- 0,2   |
|                |                      | Senegalimassilia | 0,9        | 0,4 +/- 0,5   | 0,9        | 0,1 +/- 0,1   | 1,0        | 1,0 +/- 1,2   | 0,9        | 0,1 +/- 0,1   |
|                |                      | Adlercreutzia    | 0,7        | 0,2 +/- 0,5   | 0,6        | 0,0 +/- 0,1   | 0,7        | 0,2 +/- 0,2   | 0,7        | 0,1 +/- 0,1   |
|                |                      | Collinsella      | 0,7        | 0,3 +/- 0,6   | 0,5        | 0,0 +/- 0,0   | 0,7        | 1,0 +/- 2,5   | 0,5        | 0,0 +/- 0,1   |
|                |                      | Eggerthella      | 0,5        | 0,1 +/- 0,3   | 0,3        | 0,0 +/- 0,0   | 0,4        | 0,0 +/- 0,0   | 0,3        | 0,0 +/- 0,0   |
|                |                      | Slackia          | 0,5        | 0,1 +/- 0,1   | 0,2        | 0,0 +/- 0,0   | 0,5        | 0,1 +/- 0,2   | 0,4        | 0,0 +/- 0,1   |
| Bacteroidetes  |                      |                  | 1,0        | 24,7 +/- 9,3  | 1,0        | 37,3 +/- 11,1 | 1,0        | 31,4 +/- 9,0  | 1,0        | 43,6 +/- 12,0 |
|                | Porphyromonadaceae   |                  | 0,1        | 0,5 +/- 1,7   | 0,2        | 0,8 +/- 2,9   | 0,3        | 0,0 +/- 0,0   | 0,1        | 0,1 +/- 0,3   |
|                |                      | NI               | 0,1        | 0,5 +/- 1,7   | 0,2        | 0,8 +/- 2,9   | 0,3        | 0,0 +/- 0,0   | 0,1        | 0,1 +/- 0,3   |
|                | [Barnesiellaceae]    |                  | 0,9        | 0,5 +/- 0,6   | 0,9        | 1,2 +/- 1,3   | 0,7        | 0,4 +/- 0,6   | 0,8        | 1,0 +/- 1,3   |
|                |                      | Barnesiella      | 0,9        | 0,5 +/- 0,6   | 0,9        | 1,2 +/- 1,3   | 0,7        | 0,4 +/- 0,6   | 0,8        | 1,0 +/- 1,3   |
|                | [Odoribacteraceae]   |                  | 0,9        | 0,2 +/- 0,2   | 0,9        | 0,4 +/- 0,4   | 0,9        | 0,2 +/- 0,2   | 1,0        | 0,4 +/- 0,8   |
|                |                      | Butyrivibrio     | 0,8        | 0,1 +/- 0,1   | 0,7        | 0,2 +/- 0,3   | 0,7        | 0,1 +/- 0,1   | 0,7        | 0,1 +/- 0,1   |
|                |                      | Odoribacter      | 0,9        | 0,1 +/- 0,1   | 0,9        | 0,2 +/- 0,2   | 0,9        | 0,1 +/- 0,1   | 1,0        | 0,3 +/- 0,7   |
|                | [Paraprevotellaceae] |                  | 0,7        | 0,3 +/- 0,4   | 0,5        | 0,8 +/- 2,1   | 0,7        | 0,5 +/- 0,7   | 0,7        | 0,7 +/- 1,2   |
|                |                      | NI               | 0,3        | 0,1 +/- 0,2   | 0,3        | 0,1 +/- 0,2   | 0,1        | 0,0 +/- 0,0   | 0,1        | 0,0 +/- 0,1   |
|                |                      | [Prevotella]     | 0,3        | 0,1 +/- 0,3   | 0,1        | 0,5 +/- 2,1   | 0,3        | 0,3 +/- 0,7   | 0,3        | 0,4 +/- 1,2   |
|                |                      | CF231            | 0,0        | 0,0 +/- 0,0   | 0,0        | 0,0 +/- 0,0   | 0,1        | 0,0 +/- 0,0   | 0,1        | 0,0 +/- 0,0   |
|                |                      | Paraprevotella   | 0,3        | 0,1 +/- 0,3   | 0,3        | 0,2 +/- 0,4   | 0,5        | 0,2 +/- 0,3   | 0,6        | 0,3 +/- 0,4   |
|                | Bacteroidaceae       |                  | 1,0        | 17,5 +/- 11,1 | 1,0        | 26,7 +/- 11,1 | 1,0        | 17,3 +/- 12,0 | 1,0        | 22,6 +/- 14,0 |
|                |                      | Bacteroides      | 1,0        | 17,5 +/- 11,1 | 1,0        | 26,7 +/- 11,1 | 1,0        | 17,3 +/- 12,0 | 1,0        | 22,6 +/- 14,0 |
|                | Porphyromonadaceae   |                  | 1,0        | 0,8 +/- 0,5   | 1,0        | 1,5 +/- 0,9   | 1,0        | 0,7 +/- 0,6   | 1,0        | 1,0 +/- 0,6   |
|                |                      | Parabacteroides  | 1,0        | 0,8 +/- 0,5   | 1,0        | 1,5 +/- 0,9   | 1,0        | 0,7 +/- 0,6   | 1,0        | 1,0 +/- 0,6   |
|                | Prevotellaceae       |                  | 0,6        | 4,2 +/- 7,4   | 0,7        | 4,9 +/- 9,6   | 0,7        | 10,3 +/- 14,4 | 0,7        | 15,2 +/- 21,7 |
|                |                      | Prevotella       | 0,6        | 4,2 +/- 7,4   | 0,7        | 4,9 +/- 9,6   | 0,7        | 10,3 +/- 14,4 | 0,7        | 15,2 +/- 21,7 |
|                | Rikenellaceae        |                  | 0,9        | 0,5 +/- 1,2   | 1,0        | 0,7 +/- 1,1   | 0,9        | 0,4 +/- 0,4   | 1,0        | 1,0 +/- 1,3   |
|                |                      | Alistipes        | 0,9        | 0,5 +/- 1,2   | 1,0        | 0,7 +/- 1,1   | 0,9        | 0,4 +/- 0,4   | 1,0        | 1,0 +/- 1,3   |
|                | S24-7                |                  | 0,3        | 0,3 +/- 1,1   | 0,3        | 0,2 +/- 0,8   | 0,5        | 1,6 +/- 5,1   | 0,5        | 1,6 +/- 3,4   |
|                |                      | NI               | 0,3        | 0,3 +/- 1,1   | 0,3        | 0,2 +/- 0,8   | 0,5        | 1,6 +/- 5,1   | 0,5        | 1,6 +/- 3,4   |
| Cyanobacteria  |                      |                  | 0,3        | 0,1 +/- 0,2   | 0,6        | 0,4 +/- 0,8   | 0,4        | 0,1 +/- 0,3   | 0,5        | 0,2 +/- 0,6   |
|                | NI                   |                  | 0,3        | 0,1 +/- 0,2   | 0,5        | 0,3 +/- 0,8   | 0,4        | 0,1 +/- 0,3   | 0,4        | 0,2 +/- 0,6   |
|                |                      | NI               | 0,3        | 0,1 +/- 0,2   | 0,5        | 0,3 +/- 0,8   | 0,4        | 0,1 +/- 0,3   | 0,4        | 0,2 +/- 0,6   |
|                | Chloroplast          |                  | 0,0        | 0,0 +/- 0,0   | 0,3        | 0,0 +/- 0,0   | 0,0        | 0,0 +/- 0,0   | 0,1        | 0,0 +/- 0,0   |
|                |                      | Streptophyta     | 0,0        | 0,0 +/- 0,0   | 0,3        | 0,0 +/- 0,0   | 0,0        | 0,0 +/- 0,0   | 0,1        | 0,0 +/- 0,0   |

**Table S4: Prevalence and relative abundances of the bacterial taxa (Phylum, Family and Genus) present in the fecal microbiota of the subjects at baseline (T0) and at the end of the treatment administration (T1) in the Placebo and β-glucan groups. Only are shown the taxa with a relative abundance ≥ 0.1%.**

| Phylum / C / Family / Genus       | Placebo    |               |            |               | β-Glucan   |               |            |               |
|-----------------------------------|------------|---------------|------------|---------------|------------|---------------|------------|---------------|
|                                   | Time "0"   |               | Time "1"   |               | Time "0"   |               | Time "1"   |               |
|                                   | Prevalence | Mean +/- SD   |
| Euryarchaeota                     | 0.4        | 0.6 +/- 1.0   | 0.4        | 0.0 +/- 0.1   | 0.3        | 0.1 +/- 0.3   | 0.1        | 0.0 +/- 0.0   |
| Methanobacteriaceae               | 0.4        | 0.6 +/- 1.0   | 0.4        | 0.0 +/- 0.1   | 0.3        | 0.1 +/- 0.3   | 0.1        | 0.0 +/- 0.0   |
| Methanobrevibacter                | 0.4        | 0.6 +/- 1.0   | 0.4        | 0.0 +/- 0.1   | 0.3        | 0.1 +/- 0.3   | 0.1        | 0.0 +/- 0.0   |
| Firmicutes                        | 1.0        | 65.3 +/- 11.6 | 1.0        | 56.6 +/- 11.7 | 1.0        | 59.2 +/- 11.5 | 1.0        | 50.2 +/- 15.2 |
| Lactobacillales                   | 0.2        | 0.0 +/- 0.0   | 0.1        | 0.0 +/- 0.0   | 0.3        | 0.0 +/- 0.0   | 0.0        | 0.0 +/- 0.0   |
| Lactobacillus                     | 0.2        | 0.0 +/- 0.0   | 0.1        | 0.0 +/- 0.0   | 0.3        | 0.0 +/- 0.0   | 0.0        | 0.0 +/- 0.0   |
| Enterococcaceae                   | 0.2        | 0.0 +/- 0.1   | 0.1        | 0.0 +/- 0.0   | 0.2        | 0.0 +/- 0.0   | 0.2        | 0.0 +/- 0.0   |
| Enterococcus                      | 0.1        | 0.0 +/- 0.1   | 0.1        | 0.0 +/- 0.0   | 0.1        | 0.0 +/- 0.0   | 0.2        | 0.0 +/- 0.0   |
| Lactobacillaceae                  | 0.2        | 0.0 +/- 0.1   | 0.1        | 0.0 +/- 0.0   | 0.3        | 0.0 +/- 0.0   | 0.1        | 0.0 +/- 0.0   |
| Lactobacillus                     | 0.2        | 0.0 +/- 0.1   | 0.1        | 0.0 +/- 0.0   | 0.3        | 0.0 +/- 0.0   | 0.1        | 0.0 +/- 0.0   |
| Leuconostocaceae                  | 0.1        | 0.0 +/- 0.0   | 0.0        | 0.0 +/- 0.0   | 0.0        | 0.0 +/- 0.0   | 0.1        | 0.0 +/- 0.2   |
| Weissella                         | 0.1        | 0.0 +/- 0.0   | 0.0        | 0.0 +/- 0.0   | 0.0        | 0.0 +/- 0.0   | 0.1        | 0.0 +/- 0.2   |
| Streptococcaceae                  | 1.0        | 0.4 +/- 0.6   | 0.8        | 0.1 +/- 0.1   | 0.8        | 0.4 +/- 0.8   | 0.8        | 0.1 +/- 0.2   |
| Lactococcus                       | 0.2        | 0.1 +/- 0.3   | 0.2        | 0.0 +/- 0.0   | 0.3        | 0.0 +/- 0.1   | 0.1        | 0.0 +/- 0.0   |
| Streptococcus                     | 1.0        | 0.3 +/- 0.4   | 0.7        | 0.1 +/- 0.1   | 0.8        | 0.3 +/- 0.7   | 0.8        | 0.1 +/- 0.2   |
| Turicibacteraceae                 | 0.4        | 0.0 +/- 0.1   | 0.3        | 0.0 +/- 0.1   | 0.2        | 0.0 +/- 0.0   | 0.2        | 0.0 +/- 0.1   |
| Turicibacter                      | 0.4        | 0.0 +/- 0.1   | 0.3        | 0.0 +/- 0.1   | 0.2        | 0.0 +/- 0.0   | 0.2        | 0.0 +/- 0.1   |
| Unclassified Clostridiales        | 1.0        | 4.5 +/- 3.3   | 1.0        | 4.2 +/- 3.3   | 1.0        | 3.2 +/- 1.8   | 1.0        | 3.9 +/- 2.7   |
| Unclassified Clostridiales        | 1.0        | 4.5 +/- 3.3   | 1.0        | 4.2 +/- 3.3   | 1.0        | 3.2 +/- 1.8   | 1.0        | 3.9 +/- 2.7   |
| Clostridiales_Incertae Sedis XIII | 0.9        | 0.2 +/- 0.2   | 0.7        | 0.1 +/- 0.1   | 0.9        | 0.1 +/- 0.1   | 0.9        | 0.1 +/- 0.1   |
| Anaerovorax                       | 0.9        | 0.2 +/- 0.2   | 0.7        | 0.1 +/- 0.1   | 0.9        | 0.1 +/- 0.1   | 0.9        | 0.1 +/- 0.1   |
| Christensenellaceae               | 0.8        | 0.3 +/- 0.6   | 0.7        | 0.2 +/- 0.6   | 0.8        | 0.2 +/- 0.2   | 1.0        | 0.3 +/- 0.5   |
| NI                                | 0.8        | 0.3 +/- 0.6   | 0.7        | 0.2 +/- 0.6   | 0.8        | 0.2 +/- 0.2   | 1.0        | 0.3 +/- 0.5   |
| Christensenella                   | 0.2        | 0.0 +/- 0.0   | 0.1        | 0.0 +/- 0.0   | 0.1        | 0.0 +/- 0.0   | 0.2        | 0.0 +/- 0.0   |
| Clostridiaceae                    | 1.0        | 1.4 +/- 1.0   | 1.0        | 0.8 +/- 1.0   | 1.0        | 1.2 +/- 0.9   | 1.0        | 0.7 +/- 0.5   |
| NI                                | 1.0        | 0.3 +/- 0.4   | 1.0        | 0.3 +/- 0.3   | 1.0        | 0.4 +/- 0.3   | 0.9        | 0.3 +/- 0.2   |
| Clostridium                       | 1.0        | 0.4 +/- 0.6   | 1.0        | 0.2 +/- 0.2   | 1.0        | 0.2 +/- 0.2   | 0.9        | 0.2 +/- 0.2   |
| SMB53                             | 0.5        | 0.0 +/- 0.0   | 0.3        | 0.0 +/- 0.0   | 0.5        | 0.0 +/- 0.0   | 0.3        | 0.0 +/- 0.0   |
| Dehalobacteriaceae                | 0.1        | 0.0 +/- 0.0   | 0.1        | 0.0 +/- 0.0   | 0.1        | 0.0 +/- 0.0   | 0.4        | 0.0 +/- 0.0   |
| Dehalobacterium                   | 0.1        | 0.0 +/- 0.0   | 0.1        | 0.0 +/- 0.0   | 0.1        | 0.0 +/- 0.0   | 0.4        | 0.0 +/- 0.0   |
| Lachnospiraceae                   | 1.0        | 24.3 +/- 6.2  | 1.0        | 19.0 +/- 8.0  | 1.0        | 24.0 +/- 7.3  | 1.0        | 18.7 +/- 10.0 |
| Lachnospiraceae_incertae_sedis    | 1.0        | 10.1 +/- 3.9  | 1.0        | 9.2 +/- 3.7   | 1.0        | 10.8 +/- 4.2  | 1.0        | 8.5 +/- 4.8   |
| Aerostipes                        | 0.9        | 0.2 +/- 0.2   | 0.9        | 0.1 +/- 0.1   | 0.9        | 0.4 +/- 0.8   | 0.9        | 0.2 +/- 0.2   |
| Blautia                           | 1.0        | 5.3 +/- 2.4   | 1.0        | 2.7 +/- 3.0   | 1.0        | 4.0 +/- 2.7   | 1.0        | 2.4 +/- 2.1   |
| Coprococcus                       | 1.0        | 3.1 +/- 1.5   | 1.0        | 3.0 +/- 2.3   | 1.0        | 3.1 +/- 0.9   | 1.0        | 3.4 +/- 3.5   |
| Dorea                             | 1.0        | 0.9 +/- 0.4   | 1.0        | 0.7 +/- 0.5   | 1.0        | 1.0 +/- 0.7   | 1.0        | 0.6 +/- 0.5   |
| Lachnobacterium                   | 0.0        | 0.0 +/- 0.0   | 0.1        | 0.0 +/- 0.0   | 0.1        | 0.0 +/- 0.0   | 0.1        | 0.0 +/- 0.0   |
| Lachnospira                       | 1.0        | 1.2 +/- 1.4   | 1.0        | 1.0 +/- 0.6   | 1.0        | 1.2 +/- 0.8   | 1.0        | 0.7 +/- 0.5   |
| Roseburia                         | 1.0        | 0.5 +/- 0.5   | 1.0        | 0.7 +/- 0.7   | 1.0        | 0.6 +/- 0.7   | 1.0        | 0.5 +/- 0.5   |
| Peptococcaceae                    | 0.3        | 0.0 +/- 0.1   | 0.1        | 0.1 +/- 0.2   | 0.3        | 0.0 +/- 0.0   | 0.3        | 0.0 +/- 0.0   |
| NI                                | 0.1        | 0.0 +/- 0.0   | 0.1        | 0.0 +/- 0.0   | 0.1        | 0.0 +/- 0.0   | 0.1        | 0.0 +/- 0.0   |
| Peptococcus                       | 0.2        | 0.0 +/- 0.1   | 0.1        | 0.1 +/- 0.2   | 0.1        | 0.0 +/- 0.0   | 0.1        | 0.0 +/- 0.0   |
| Peptostreptococcaceae             | 0.7        | 0.0 +/- 0.0   | 0.5        | 0.0 +/- 0.0   | 0.7        | 0.0 +/- 0.0   | 0.5        | 0.0 +/- 0.0   |
| NI                                | 0.7        | 0.0 +/- 0.0   | 0.5        | 0.0 +/- 0.0   | 0.7        | 0.0 +/- 0.0   | 0.5        | 0.0 +/- 0.0   |
| Ruminococcaceae                   | 1.0        | 30.0 +/- 7.2  | 1.0        | 27.5 +/- 7.3  | 1.0        | 27.1 +/- 7.0  | 1.0        | 23.8 +/- 8.1  |
| Faecalibacterium                  | 1.0        | 13.3 +/- 4.0  | 1.0        | 12.1 +/- 4.5  | 1.0        | 11.8 +/- 4.4  | 1.0        | 10.0 +/- 4.3  |
| Aerotruncus                       | 0.4        | 0.0 +/- 0.0   | 0.3        | 0.0 +/- 0.0   | 0.5        | 0.0 +/- 0.0   | 0.5        | 0.0 +/- 0.0   |
| Oscillospira                      | 1.0        | 0.8 +/- 0.6   | 1.0        | 0.9 +/- 0.4   | 1.0        | 0.8 +/- 0.6   | 1.0        | 1.0 +/- 0.6   |
| Ruminococcus                      | 1.0        | 1.6 +/- 1.3   | 1.0        | 1.4 +/- 1.2   | 1.0        | 1.8 +/- 1.1   | 1.0        | 1.5 +/- 0.8   |
| Veillonellaceae                   | 1.0        | 1.7 +/- 1.7   | 1.0        | 1.9 +/- 2.4   | 1.0        | 1.6 +/- 1.8   | 1.0        | 1.4 +/- 0.7   |
| Acidaminococcus                   | 0.1        | 0.0 +/- 0.0   | 0.1        | 0.1 +/- 0.3   | 0.1        | 0.1 +/- 0.3   | 0.1        | 0.0 +/- 0.1   |
| Dialister                         | 0.7        | 0.9 +/- 1.0   | 0.7        | 0.9 +/- 0.8   | 0.7        | 0.8 +/- 1.0   | 0.8        | 0.9 +/- 0.8   |
| Megamos                           | 0.3        | 0.2 +/- 0.9   | 0.1        | 0.6 +/- 2.3   | 0.3        | 0.4 +/- 1.7   | 0.2        | 0.2 +/- 0.6   |
| Megasphaera                       | 0.1        | 0.4 +/- 1.5   | 0.1        | 0.0 +/- 0.1   | 0.1        | 0.0 +/- 0.0   | 0.1        | 0.0 +/- 0.0   |
| Mitsuokella                       | 0.0        | 0.0 +/- 0.0   | 0.0        | 0.0 +/- 0.0   | 0.1        | 0.0 +/- 0.1   | 0.1        | 0.0 +/- 0.0   |
| Phascolarctobacterium             | 0.5        | 0.1 +/- 0.1   | 0.6        | 0.2 +/- 0.3   | 0.6        | 0.2 +/- 0.5   | 0.4        | 0.3 +/- 0.4   |
| Succiniclasticum                  | 0.1        | 0.0 +/- 0.2   | 0.0        | 0.0 +/- 0.0   | 0.1        | 0.0 +/- 0.0   | 0.0        | 0.0 +/- 0.0   |
| Veillonella                       | 0.5        | 0.0 +/- 0.1   | 0.5        | 0.1 +/- 0.3   | 0.3        | 0.0 +/- 0.0   | 0.5        | 0.0 +/- 0.0   |
| Erysipelotrichaceae               | 1.0        | 1.6 +/- 3.6   | 1.0        | 1.9 +/- 3.6   | 1.0        | 0.8 +/- 0.9   | 0.9        | 0.6 +/- 0.6   |
| Asteroleplasma                    | 0.9        | 1.2 +/- 3.5   | 0.9        | 1.8 +/- 3.6   | 0.8        | 0.4 +/- 0.5   | 0.8        | 0.4 +/- 0.4   |
| [Eubacterium]                     | 0.5        | 0.3 +/- 0.6   | 0.5        | 0.1 +/- 0.1   | 0.6        | 0.2 +/- 0.5   | 0.5        | 0.2 +/- 0.4   |
| Bulleidia                         | 0.1        | 0.0 +/- 0.1   | 0.1        | 0.0 +/- 0.0   | 0.1        | 0.0 +/- 0.0   | 0.1        | 0.0 +/- 0.0   |
| Catenibacterium                   | 0.1        | 0.1 +/- 0.2   | 0.1        | 0.0 +/- 0.2   | 0.1        | 0.2 +/- 0.8   | 0.3        | 0.1 +/- 0.2   |
| cc_115                            | 0.1        | 0.0 +/- 0.0   | 0.0        | 0.0 +/- 0.0   | 0.1        | 0.0 +/- 0.0   | 0.1        | 0.0 +/- 0.0   |
| Holdemanella                      | 0.3        | 0.0 +/- 0.0   | 0.5        | 0.0 +/- 0.0   | 0.3        | 0.0 +/- 0.0   | 0.3        | 0.0 +/- 0.0   |
| Lentisphaerae                     | 0.3        | 0.0 +/- 0.0   | 0.3        | 0.0 +/- 0.0   | 0.3        | 0.5 +/- 1.8   | 0.2        | 0.5 +/- 2.1   |
| Victivallaceae                    | 0.3        | 0.0 +/- 0.0   | 0.3        | 0.0 +/- 0.0   | 0.3        | 0.5 +/- 1.8   | 0.2        | 0.5 +/- 2.1   |
| Victivallis                       | 0.3        | 0.0 +/- 0.0   | 0.3        | 0.0 +/- 0.0   | 0.3        | 0.5 +/- 1.8   | 0.2        | 0.5 +/- 2.1   |

Table S4 (.../...)

| Phylum / C / Family / Genus   | Placebo    |             |            |             | β-Glucan   |             |            |             |
|-------------------------------|------------|-------------|------------|-------------|------------|-------------|------------|-------------|
|                               | Time "0"   |             | Time "1"   |             | Time "0"   |             | Time "1"   |             |
|                               | Prevalence | Mean +/- SD |
| Proteobacteria                | 1,0        | 0,6 +/- 0,5 | 1,0        | 2,4 +/- 3,7 | 1,0        | 3,4 +/- 9,3 | 1,0        | 3,4 +/- 8,2 |
| Alcaligeaceae                 | 0,7        | 0,3 +/- 0,3 | 0,9        | 0,7 +/- 1,0 | 0,9        | 0,4 +/- 0,4 | 1,0        | 0,5 +/- 0,5 |
| Sutterella                    | 0,7        | 0,3 +/- 0,3 | 0,9        | 0,7 +/- 1,0 | 0,9        | 0,4 +/- 0,4 | 1,0        | 0,5 +/- 0,5 |
| Oxalobacteraceae              | 0,1        | 0,0 +/- 0,0 | 0,3        | 0,0 +/- 0,0 | 0,0        | 0,0 +/- 0,0 | 0,0        | 0,0 +/- 0,0 |
| Oxalobacter                   | 0,1        | 0,0 +/- 0,0 | 0,3        | 0,0 +/- 0,0 | 0,0        | 0,0 +/- 0,0 | 0,0        | 0,0 +/- 0,0 |
| Desulfovibrionaceae           | 0,8        | 0,2 +/- 0,3 | 0,7        | 0,2 +/- 0,4 | 0,8        | 0,2 +/- 0,3 | 0,8        | 0,2 +/- 0,3 |
| NI                            | 0,3        | 0,0 +/- 0,0 | 0,2        | 0,0 +/- 0,0 | 0,2        | 0,0 +/- 0,0 | 0,2        | 0,0 +/- 0,0 |
| Bilophila                     | 0,7        | 0,1 +/- 0,1 | 0,7        | 0,0 +/- 0,1 | 0,7        | 0,1 +/- 0,1 | 0,6        | 0,1 +/- 0,1 |
| Desulfovibrio                 | 0,3        | 0,1 +/- 0,2 | 0,3        | 0,2 +/- 0,4 | 0,5        | 0,1 +/- 0,3 | 0,4        | 0,1 +/- 0,3 |
| Succinivibrionaceae           | 0,0        | 0,0 +/- 0,0 | 0,1        | 0,1 +/- 0,2 | 0,3        | 2,4 +/- 9,4 | 0,1        | 2,1 +/- 8,0 |
| Succinivibrio                 | 0,0        | 0,0 +/- 0,0 | 0,1        | 0,1 +/- 0,2 | 0,3        | 2,4 +/- 9,4 | 0,1        | 2,1 +/- 8,0 |
| Enterobacteriaceae            | 0,7        | 0,1 +/- 0,1 | 0,8        | 0,1 +/- 0,2 | 0,8        | 0,2 +/- 0,4 | 0,8        | 0,4 +/- 0,9 |
| genus Escherichia/Shigella    | 0,7        | 0,1 +/- 0,1 | 0,8        | 0,1 +/- 0,2 | 0,8        | 0,2 +/- 0,4 | 0,8        | 0,4 +/- 0,9 |
| Klebsiella                    | 0,0        | 0,0 +/- 0,0 | 0,1        | 0,0 +/- 0,0 | 0,1        | 0,0 +/- 0,0 | 0,1        | 0,0 +/- 0,0 |
| Pasteurellaceae               | 0,4        | 0,0 +/- 0,1 | 0,6        | 0,7 +/- 2,6 | 0,3        | 0,0 +/- 0,0 | 0,5        | 0,0 +/- 0,1 |
| Haemophilus                   | 0,4        | 0,0 +/- 0,1 | 0,6        | 0,7 +/- 2,6 | 0,3        | 0,0 +/- 0,0 | 0,5        | 0,0 +/- 0,1 |
| Synergistetes                 | 0,1        | 0,0 +/- 0,0 | 0,2        | 0,0 +/- 0,0 | 0,1        | 0,0 +/- 0,0 | 0,1        | 0,0 +/- 0,0 |
| Synergistaceae                | 0,1        | 0,0 +/- 0,0 | 0,2        | 0,0 +/- 0,0 | 0,1        | 0,0 +/- 0,0 | 0,1        | 0,0 +/- 0,0 |
| Tenericutes                   | 0,4        | 0,1 +/- 0,3 | 0,4        | 0,1 +/- 0,3 | 0,2        | 0,0 +/- 0,0 | 0,5        | 0,0 +/- 0,1 |
| assimiled to mollicutes order | 0,3        | 0,1 +/- 0,1 | 0,3        | 0,0 +/- 0,1 | 0,1        | 0,0 +/- 0,0 | 0,3        | 0,0 +/- 0,1 |
| assimiled to RF3 order        | 0,3        | 0,1 +/- 0,2 | 0,3        | 0,1 +/- 0,2 | 0,1        | 0,0 +/- 0,0 | 0,2        | 0,0 +/- 0,0 |
| Verrucomicrobia               | 0,7        | 1,7 +/- 3,4 | 0,7        | 1,5 +/- 1,8 | 0,7        | 0,3 +/- 0,4 | 0,7        | 1,0 +/- 1,8 |
| [Cerasicoccaceae]             | 0,2        | 0,0 +/- 0,0 | 0,1        | 0,0 +/- 0,0 | 0,1        | 0,0 +/- 0,0 | 0,0        | 0,0 +/- 0,0 |
| NI                            | 0,2        | 0,0 +/- 0,0 | 0,1        | 0,0 +/- 0,0 | 0,1        | 0,0 +/- 0,0 | 0,0        | 0,0 +/- 0,0 |
| Verrucomicrobiaceae           | 0,7        | 1,7 +/- 3,4 | 0,7        | 1,5 +/- 1,8 | 0,7        | 0,3 +/- 0,4 | 0,7        | 1,0 +/- 1,8 |
| Akkermansia                   | 0,7        | 1,7 +/- 3,4 | 0,7        | 1,5 +/- 1,8 | 0,7        | 0,3 +/- 0,4 | 0,7        | 1,0 +/- 1,8 |

Table S4 (.../...)
