# Supplementary material for: Modulation of Postprandial Plasma Concentrations of Digestive Hormones and Gut Microbiota by Foods Containing Oat ß-Glucans in Healthy Volunteers
Source: MDPI journal article supplement (doi:10.3390/foods12040700), 2023-02-06
Supplement: s1 [file s1]

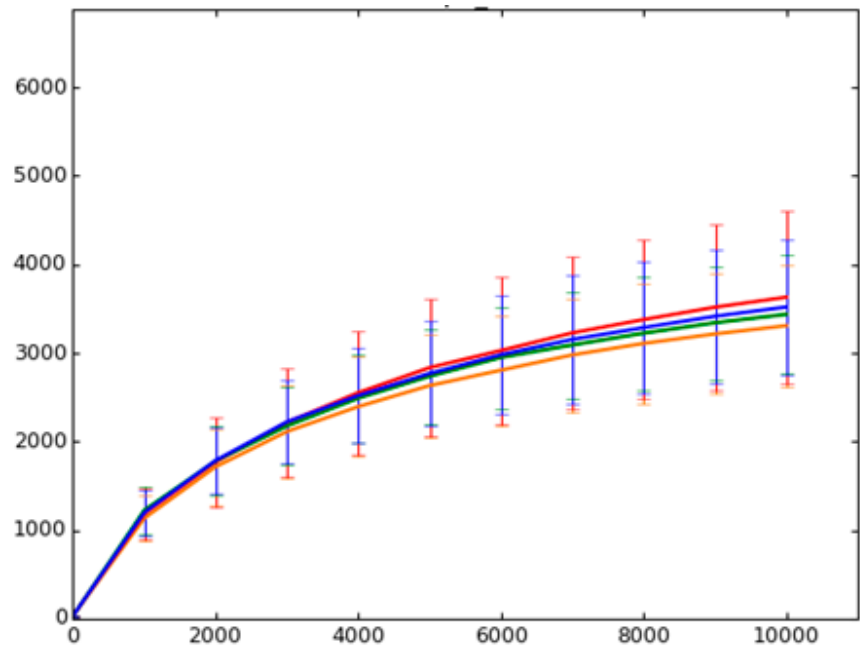

**Figure S2:** Rarefaction curves before and after treatment with control or  $\beta$ -glucan supplemented foods. (Red curve: control group at T0; Blue curve:  $\beta$ -glucan group at T0; Orange curve: control group at T1; Green curve:  $\beta$ -glucan at T1).
