# Supplementary material for: Modulation of Postprandial Plasma Concentrations of Digestive Hormones and Gut Microbiota by Foods Containing Oat ß-Glucans in Healthy Volunteers
Source: MDPI journal article supplement (doi:10.3390/foods12040700), 2023-02-06
Supplement: s1 [file s1]

| Parameters                           | Values     | Reference range |
|--------------------------------------|------------|-----------------|
| Women (%)                            | 85.7       |                 |
| Age (y)                              | 24,7 ± 3,2 |                 |
| Body Mass Index (kg/m <sup>2</sup> ) | 21,6 ± 2,2 |                 |
| Glycaemia (mg/dL)                    | 93 ± 7     | 70 – 99         |
| Ureic N <sub>2</sub> (mg/dL)         | 12,4 ± 2,4 | 4,7 - 23,4      |
| Uric acid (mg/dL)                    | 3,3 ± 0,9  | 2,6 - 6,0       |
| Bilirubin (mg/dL)                    | 0,6 ± 0,3  | 0,0 - 1,0       |
| Alkaline phosphatase (U/L)           | 135 ± 37   | 65 – 300        |
| GOT (U/L)                            | 20,1 ± 3,1 | 0 – 32          |
| LDH (U/L)                            | 287 ± 56   | 230 – 460       |
| Calcium (mg/dL)                      | 9,9 ± 1,0  | 8,5 - 10,5      |
| Phosphorus (mg/dL)                   | 4,1 ± 0,4  | 2,5 - 5,6       |
| Albumin (g/dL )                      | 4,4 ± 0,2  | 3,5 - 5,2       |
| Total protein (g/dL)                 | 7,3 ± 0,4  | 6,1 - 7,9       |
| Total cholesterol (md/dL)            | 194 ± 29   | Hasta 200       |
| HDL cholesterol (mg/dL)              | 66 ± 19    | 30 – 85         |
| LDL-cholesterol (mg/dL)              | 109 ± 25   | 0 – 150         |
| VLDL-cholesterol (mg/dL)             | 19 ± 5     | < 40            |
| Triacylglycerol (mg/dL)              | 96 ± 27    | 10 - 160        |

**Table S1:** Anthropometrical and biochemical characteristics of the subjects recruited in the Acute study (Means ± SD)
